# Supplementary material for: Insights into Hox Protein Function from a Large Scale Combinatorial Analysis of Protein Domains
Source: PubMed Central journal article supplement (PMC3203194; doi:10.1371/journal.pgen.1002302), 2011-10-27
Supplement: pgen.1002302.s006.pdf [file pgen.1002302.s006.pdf]

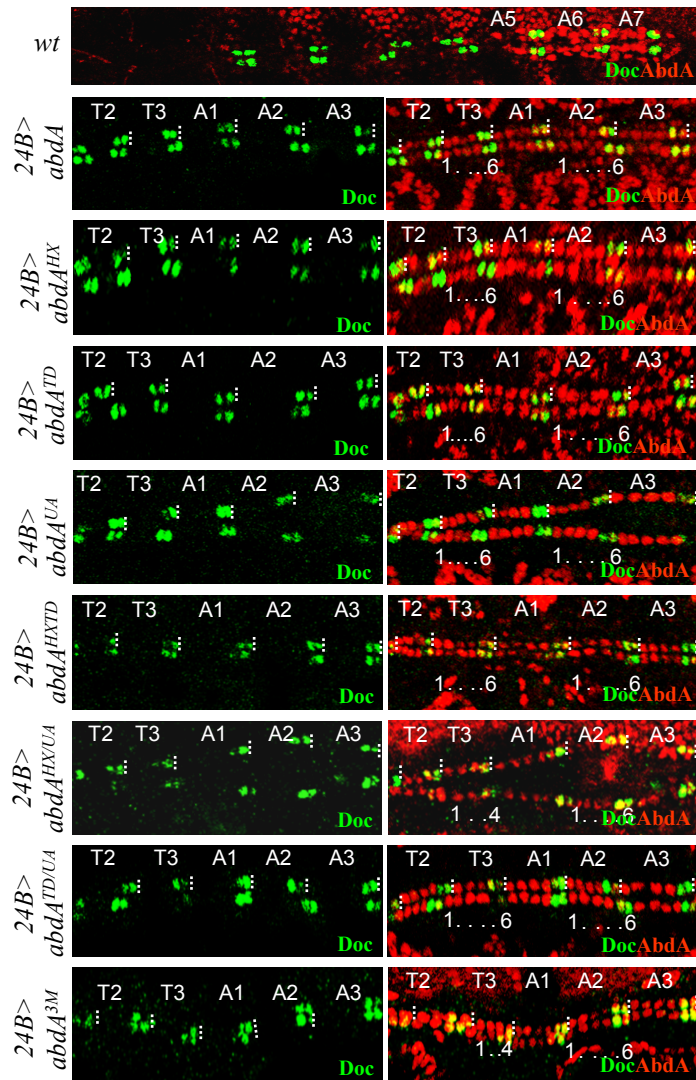

Figure S6
