# Supplementary material for: Insights into Hox Protein Function from a Large Scale Combinatorial Analysis of Protein Domains
Source: PubMed Central journal article supplement (PMC3203194; doi:10.1371/journal.pgen.1002302), 2011-10-27
Supplement: pgen.1002302.s010.pdf [file pgen.1002302.s010.pdf]

|              | wt        | HX        | TD        | UA        | HX<br>TD  | HX<br>UA  | TD<br>UA  | 3M        | HTH      |
|--------------|-----------|-----------|-----------|-----------|-----------|-----------|-----------|-----------|----------|
| embryo 1     | 5         | 5         | 5         | 3         | 2         | 2         | 1         | 5         | 0        |
| embryo 2     | 4         | 5         | 5         | 3         | 4         | 1         | 0         | 5         | 0        |
| embryo 3     | 5         | 5         | 5         | 5         | 5         | 4         | 2         | 4         | 0        |
| embryo 4     | 1         | 5         | 4         | 5         | 5         | 5         | 3         | 5         | 0        |
| embryo 5     | 5         | 5         | 5         | 3         | 5         | 4         | 3         | 5         | 0        |
| embryo 6     | 5         | 3         | 4         | 3         | 5         | 2         | 1         | 5         | 0        |
| embryo 7     | 5         | 5         | 5         | 4         | 5         | 0         | 5         | 4         | 0        |
| embryo 8     | 5         | 3         | 4         | 5         | 3         | 0         | 3         | 4         | 0        |
| embryo 9     | 5         | 5         | 5         | 0         | 4         | 2         | 5         | 5         | 0        |
| embryo 10    | 5         | 5         | 5         | 4         | 5         | 2         | 2         | 4         | 0        |
| <b>total</b> | <b>45</b> | <b>46</b> | <b>47</b> | <b>35</b> | <b>43</b> | <b>22</b> | <b>25</b> | <b>46</b> | <b>0</b> |

**Fig. S10**
